# Supplementary material
Source: PubMed Central journal article supplement (PMC9438422)
Supplement: KID.0007872021-s0001.pdf [file KID.0007872021-s0001.pdf]

## Supplemental Files

**Supplemental Table 1.** Definitions of county-level characteristics and data sources<sup>1</sup>

| Variable                               | Definition                                                                                                                                            | Source                                                                                      | Year        |
|----------------------------------------|-------------------------------------------------------------------------------------------------------------------------------------------------------|---------------------------------------------------------------------------------------------|-------------|
| <i><u>Demographic</u></i>              |                                                                                                                                                       |                                                                                             |             |
| Population size (N, in thousands)      | County population                                                                                                                                     | Census Population Estimates                                                                 | 2018        |
| % Female                               | Percentage of the population who are female                                                                                                           | Census Population Estimates                                                                 | 2018        |
| % Aged ≥ 65 years                      | Percentage of population ages 65 and older                                                                                                            | Census Population Estimates                                                                 | 2018        |
| % Hispanic                             | Percentage of population who are Hispanic                                                                                                             | Census Population Estimates                                                                 | 2018        |
| % Asian-American                       | Percentage of the population who are Asian-American                                                                                                   | Census Population Estimates                                                                 | 2018        |
| % Black                                | Percentage of the population who are Black/African American                                                                                           | Census Population Estimates                                                                 | 2018        |
| % Foreign born                         | Percentage of the population who are foreign born                                                                                                     | American Community Survey                                                                   | 2014-2018   |
| % Not proficient in English            | Percentage of the population who are not proficient in English                                                                                        | American Community Survey                                                                   | 2014-2018   |
| % Rural                                | Percentage of the population living in a rural area                                                                                                   | Census Population Estimates                                                                 | 2010        |
| <i><u>Economic/social</u></i>          |                                                                                                                                                       |                                                                                             |             |
| Income level (median, \$ in thousands) | Median income level                                                                                                                                   | Small Area Income and Poverty Estimates                                                     | 2018        |
| % Unemployed                           | Percentage of residents aged 16–64 years who are unemployed                                                                                           | Bureau of Labor Statistics                                                                  | 2018        |
| % Without high school education        | Percentage of residents aged 24–65 years without a high school education                                                                              | American Community Survey                                                                   | 2014-2018   |
| % In poverty                           | Percentage of population living in poverty                                                                                                            | Small Area Income and Poverty Estimates                                                     | 2018        |
| Air pollution (µg/m <sup>3</sup> )     | Average daily density of fine particulate matter in micrograms per cubic meter (PM <sub>2.5</sub> )                                                   | Environmental Public Health Tracking Network                                                | 2014        |
| Social vulnerability index             | Relative vulnerability of each county in the event of a disaster, ranked on 15 social factors including unemployment, minority status, and disability | Centers for Disease Control and Prevention/Agency for Toxic Substances and Disease Registry | 2018        |
| Violent crime (N, per 100,000)         | Number of reported violent crime offenses per 100,000 population                                                                                      | Uniform Crime Reporting Program, Federal Bureau of Investigation                            | 2014 & 2016 |

|                                                   |                                                                                                                                                                               |                                                                      |             |
|---------------------------------------------------|-------------------------------------------------------------------------------------------------------------------------------------------------------------------------------|----------------------------------------------------------------------|-------------|
| Injury deaths (N, per 100,000)                    | Number of deaths due to injury per 100,000 population                                                                                                                         | National Center for Health Statistics – Mortality Files              | 2014-2018   |
| <u>Health care</u>                                |                                                                                                                                                                               |                                                                      |             |
| Primary care physicians (N, per 100,000)          | Number of primary care physicians per 100,000 population                                                                                                                      | American Medical Association                                         | 2018        |
| Internal medicine subspecialists (N, per 100,000) | Number of internal medicine subspecialists per 100,000 population, including nephrologists                                                                                    | American Medical Association                                         | 2018        |
| % Without health insurance                        | Percentage of persons aged 40–64 years without health insurance                                                                                                               | Small Area Health Insurance Estimates                                | 2017        |
| Health-care expenditures (\$ in thousands)        | County-level price-, age-, sex-, and race/ethnicity- adjusted Medicare expenditures per enrollee                                                                              | Centers for Medicare & Medicaid Services                             | 2018        |
| Dialysis facilities (N, per 100,000)              | Number of dialysis facilities per 100,000 population                                                                                                                          | Dialysis Facility Compare                                            | 2017        |
| Transplant Rate (N, per 1,000 person-years)       | Transplant rate (first transplant) per 1,000 person-years                                                                                                                     | United States Renal Data System                                      | 2010-2018   |
| <u>Health behaviors</u>                           |                                                                                                                                                                               |                                                                      |             |
| % Access to exercise opportunities                | Percentage of the county population residing within one-half mile (0.8 km) of a park or within 1 mile (1.6 km) (urban) or 3 miles (4.8 km) (rural) of a recreational facility | Business Analyst, Delorme map data, ESRI, & US Census Tigerline File | 2010 & 2019 |
| Food environment index                            | Index of factors that contribute to a healthy food environment, from 0 (worst) to 10 (best)                                                                                   | USDA Food Environment Atlas, Map the Meal Gap from Feeding America   | 2015 & 2017 |
| % Current smoking                                 | Percent of adults that reported currently smoking                                                                                                                             | Behavioral Risk Factor Surveillance System                           | 2017        |
| % Excessive drinking                              | Percent of adults that report excessive drinking                                                                                                                              | Behavioral Risk Factor Surveillance System                           | 2017        |

Abbreviations: ESRI, Environmental Systems Research Institute; USDA, United States Department of Agriculture

<sup>1</sup> In all, 18 (67%) of these measures were accessed via the County Health Rankings and Roadmaps project (1), 5 (19%) were accessed through the Area Health Resource File (2), 1 (4%) was accessed through the Dartmouth Atlas of Health Care (3), 1 (4%) was derived using data from Dialysis Facility Compare (4), 1 (4%) was accessed via the Centers for Disease Control and Prevention/Agency for Toxic Substances and Disease Registry (5), and 1 (4%) was derived using data from the United States Renal Data System (4%) (6).

## References

1. University of Wisconsin Population Health Institute: County Health Rankings & Roadmaps 2020. [Internet]. Available from: <https://www.countyhealthrankings.org> [cited 2021 Apr 26]
2. Health Resources and Services Administration, US Department of Health and Human Services.: Area Health Resource File (AHRF) 2019–2020 Release [Internet]. Available from: <https://data.hrsa.gov/data/download> [cited 2021 Apr 26]
3. Dartmouth Atlas of Health Care: Medicare Reimbursements [Internet]. Available from: <https://data.dartmouthatlas.org/medicare-reimbursements/> [cited 2021 Apr 26]
4. Data Dictionary for Quarterly Dialysis Facility Compare [Internet]. Available from: [https://data.cms.gov/provider-data/sites/default/files/data\\_dictionaries/DF\\_Data\\_Dictionary.pdf](https://data.cms.gov/provider-data/sites/default/files/data_dictionaries/DF_Data_Dictionary.pdf) [cited 2021 Jul 6]
5. Centers for Disease Control and Prevention/ Agency for Toxic Substances and Disease Registry/ Geospatial Research, Analysis, and Services Program: CDC/ATSDR Social Vulnerability Index 2018 US [Internet]. Available from: [https://www.atsdr.cdc.gov/placeandhealth/svi/data\\_documentation\\_download.html](https://www.atsdr.cdc.gov/placeandhealth/svi/data_documentation_download.html) [cited 2022 Feb 15]
6. United States Renal Data System. 2020 USRDS Annual Data Report: Epidemiology of kidney disease in the United States. National Institutes of Health, National Institute of Diabetes and Digestive and Kidney Diseases, Bethesda, MD, 2020.

**Supplementary Table 2** STROBE Statement—checklist of items that should be included in reports of observational studies

|                              | Item No. | Recommendation                                                                                                                                                                                                                                                                                                                                                                                                                                                         | Page No.    |
|------------------------------|----------|------------------------------------------------------------------------------------------------------------------------------------------------------------------------------------------------------------------------------------------------------------------------------------------------------------------------------------------------------------------------------------------------------------------------------------------------------------------------|-------------|
| <b>Title and abstract</b>    | 1        | (a) Indicate the study’s design with a commonly used term in the title or the abstract                                                                                                                                                                                                                                                                                                                                                                                 | 1           |
|                              |          | (b) Provide in the abstract an informative and balanced summary of what was done and what was found                                                                                                                                                                                                                                                                                                                                                                    | 3-4         |
| <b>Introduction</b>          |          |                                                                                                                                                                                                                                                                                                                                                                                                                                                                        |             |
| Background/rationale         | 2        | Explain the scientific background and rationale for the investigation being reported                                                                                                                                                                                                                                                                                                                                                                                   | 5           |
| Objectives                   | 3        | State specific objectives, including any prespecified hypotheses                                                                                                                                                                                                                                                                                                                                                                                                       | 6           |
| <b>Methods</b>               |          |                                                                                                                                                                                                                                                                                                                                                                                                                                                                        |             |
| Study design                 | 4        | Present key elements of study design early in the paper                                                                                                                                                                                                                                                                                                                                                                                                                | 6           |
| Setting                      | 5        | Describe the setting, locations, and relevant dates, including periods of recruitment, exposure, follow-up, and data collection                                                                                                                                                                                                                                                                                                                                        | 6           |
| Participants                 | 6        | (a) <i>Cohort study</i> —Give the eligibility criteria, and the sources and methods of selection of participants. Describe methods of follow-up<br><i>Case-control study</i> —Give the eligibility criteria, and the sources and methods of case ascertainment and control selection. Give the rationale for the choice of cases and controls<br><i>Cross-sectional study</i> —Give the eligibility criteria, and the sources and methods of selection of participants | 6-7         |
|                              |          | (b) <i>Cohort study</i> —For matched studies, give matching criteria and number of exposed and unexposed<br><i>Case-control study</i> —For matched studies, give matching criteria and the number of controls per case                                                                                                                                                                                                                                                 | n/a         |
| Variables                    | 7        | Clearly define all outcomes, exposures, predictors, potential confounders, and effect modifiers. Give diagnostic criteria, if applicable                                                                                                                                                                                                                                                                                                                               | 7, Suppl T1 |
| Data sources/<br>measurement | 8*       | For each variable of interest, give sources of data and details of methods of assessment (measurement). Describe comparability of assessment methods if there is more than one group                                                                                                                                                                                                                                                                                   | 7, Suppl T1 |
| Bias                         | 9        | Describe any efforts to address potential sources of bias                                                                                                                                                                                                                                                                                                                                                                                                              | 8-9         |
| Study size                   | 10       | Explain how the study size was arrived at                                                                                                                                                                                                                                                                                                                                                                                                                              | 7, Figure 1 |

|                        |     |                                                                                                                                                                                                                                                                                                           |                           |
|------------------------|-----|-----------------------------------------------------------------------------------------------------------------------------------------------------------------------------------------------------------------------------------------------------------------------------------------------------------|---------------------------|
| Quantitative variables | 11  | Explain how quantitative variables were handled in the analyses. If applicable, describe which groupings were chosen and why                                                                                                                                                                              | 8                         |
| Statistical methods    | 12  | (a) Describe all statistical methods, including those used to control for confounding                                                                                                                                                                                                                     | 8-9                       |
|                        |     | (b) Describe any methods used to examine subgroups and interactions                                                                                                                                                                                                                                       | n/a                       |
|                        |     | (c) Explain how missing data were addressed                                                                                                                                                                                                                                                               | 8-9                       |
|                        |     | (d) <i>Cohort study</i> —If applicable, explain how loss to follow-up was addressed<br><i>Case-control study</i> —If applicable, explain how matching of cases and controls was addressed<br><i>Cross-sectional study</i> —If applicable, describe analytical methods taking account of sampling strategy | n/a                       |
|                        |     | (e) Describe any sensitivity analyses                                                                                                                                                                                                                                                                     | n/a                       |
| <b>Results</b>         |     |                                                                                                                                                                                                                                                                                                           |                           |
| Participants           | 13* | (a) Report numbers of individuals at each stage of study—eg numbers potentially eligible, examined for eligibility, confirmed eligible, included in the study, completing follow-up, and analyzed                                                                                                         | Figure 1                  |
|                        |     | (b) Give reasons for non-participation at each stage                                                                                                                                                                                                                                                      | Figure 1                  |
|                        |     | (c) Consider use of a flow diagram                                                                                                                                                                                                                                                                        | Figure 1                  |
| Descriptive data       | 14* | (a) Give characteristics of study participants (eg demographic, clinical, social) and information on exposures and potential confounders                                                                                                                                                                  | 9-10, Table 1             |
|                        |     | (b) Indicate number of participants with missing data for each variable of interest                                                                                                                                                                                                                       | 8, Table 2                |
|                        |     | (c) <i>Cohort study</i> —summarize follow-up time (eg, average and total amount)                                                                                                                                                                                                                          | n/a                       |
| Outcome data           | 15* | <i>Cohort study</i> —Report numbers of outcome events or summary measures over time                                                                                                                                                                                                                       | n/a                       |
|                        |     | <i>Case-control study</i> —Report numbers in each exposure category, or summary measures of exposure                                                                                                                                                                                                      | n/a                       |
|                        |     | <i>Cross-sectional study</i> —Report numbers of outcome events or summary measures                                                                                                                                                                                                                        | 9-10, Figure 2            |
| Main results           | 16  | (a) Give unadjusted estimates and, if applicable, confounder-adjusted estimates and their precision (eg, 95% confidence interval). Make clear which confounders were adjusted for and why they were included                                                                                              | 9-11, Table 2, Figure 2&3 |
|                        |     | (b) Report category boundaries when continuous variables were categorized                                                                                                                                                                                                                                 | Table 1&2                 |
|                        |     | (c) If relevant, consider translating estimates of relative risk into absolute risk for a meaningful time period                                                                                                                                                                                          | n/a                       |

Continued on next page

|                          |    |                                                                                                                                                                            |       |
|--------------------------|----|----------------------------------------------------------------------------------------------------------------------------------------------------------------------------|-------|
| Other analyses           | 17 | Report other analyses done—eg analyses of subgroups and interactions, and sensitivity analyses                                                                             | n/a   |
| <b>Discussion</b>        |    |                                                                                                                                                                            |       |
| Key results              | 18 | Summarize key results with reference to study objectives                                                                                                                   | 11    |
| Limitations              | 19 | Discuss limitations of the study, taking into account sources of potential bias or imprecision. Discuss both direction and magnitude of any potential bias                 | 14-15 |
| Interpretation           | 20 | Give a cautious overall interpretation of results considering objectives, limitations, multiplicity of analyses, results from similar studies, and other relevant evidence | 15    |
| Generalizability         | 21 | Discuss the generalizability (external validity) of the study results                                                                                                      | 11-14 |
| <b>Other information</b> |    |                                                                                                                                                                            |       |
| Funding                  | 22 | Give the source of funding and the role of the funders for the present study and, if applicable, for the original study on which the present article is based              | 16    |

\*Give information separately for cases and controls in case-control studies and, if applicable, for exposed and unexposed groups in cohort and cross-sectional studies.

**Note:** An Explanation and Elaboration article discusses each checklist item and gives methodological background and published examples of transparent reporting. The STROBE checklist is best used in conjunction with this article (freely available on the Web sites of PLoS Medicine at <http://www.plosmedicine.org/>, Annals of Internal Medicine at <http://www.annals.org/>, and Epidemiology at <http://www.epidem.com/>). Information on the STROBE Initiative is available at [www.strobe-statement.org](http://www.strobe-statement.org).
